# Supplementary material for: Hangover-Relieving Effect of Ginseng Berry Kombucha Fermented by Saccharomyces cerevisiae and Gluconobacter oxydans in Ethanol-Treated Cells and Mice Model
Source: MDPI journal article supplement (doi:10.3390/antiox12030774), 2023-03-22
Supplement: s1 [file s1]

## Supplementary data

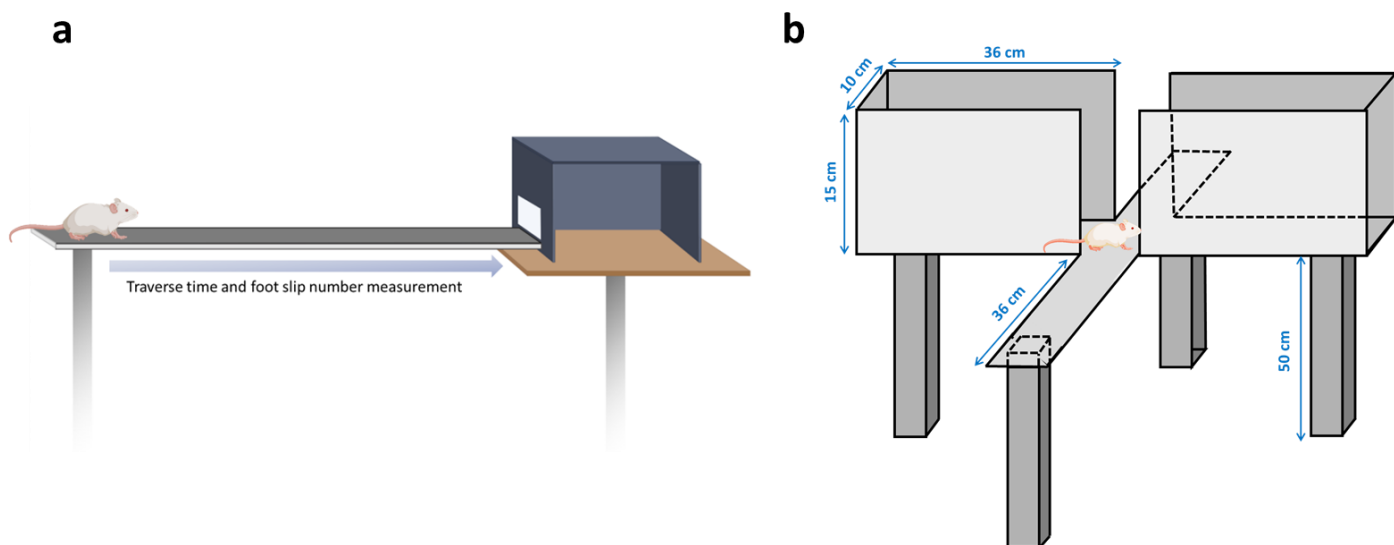

**Figure S1.** Schematics illustrating the apparatus of (a) the balance beam test and (b) elevated plus maze test.

**Table S1.** Effect of ginseng berry kombucha on serum AST, ALT, GLU, and LDH levels in mice

| Time (h)     |     | 0              | 0.5              | 1                | 2               |
|--------------|-----|----------------|------------------|------------------|-----------------|
| AST<br>(U/L) | CON |                | 460.00 ± 4.04    | 110.67 ± 54.78   | 68.00 ± 8.50    |
|              | KL  | 64.67 ± 14.24  | 112.33 ± 29.91** | 65.33 ± 2.02     | 69.50 ± 9.20    |
|              | KH  |                | 76.50 ± 2.25**   | 74.25 ± 3.75     | 80.00±2.65      |
| ALT<br>(U/L) | CON |                | 123.67 ± 18.91   | 49.67 ± 29.28    | 45.00 ± 14.64   |
|              | KL  | 33.00 ± 10.21  | 64.67 ± 2.90     | 34.50 ± 7.84     | 29.67 ± 5.01    |
|              | KH  |                | 44.33 ± 14.92**  | 41.33 ± 4.86     | 44.00 ± 5.20    |
| GLU<br>(U/L) | CON |                | 236.00 ± 26.35   | 227.33 ± 38.02   | 144.00 ± 7.81   |
|              | KL  | 163.67 ± 32.83 | 141.00 ± 9.85    | 127.00 ± 5.50    | 159.33 ± 5.35   |
|              | KH  |                | 189.67 ± 12.06   | 228.67 ± 10.07   | 150.00 ± 20.22  |
| LDH<br>(U/L) | CON |                | 881.50 ± 114.72  | 654.00 ± 115.94  | 628.33 ± 108.95 |
|              | KL  | 913.00 ± 46.95 | 1175.00 ± 130.81 | 1011.67 ± 300.31 | 757.00 ± 105.93 |
|              | KH  |                | 1053.00 ± 267.79 | 1370.25 ± 264.96 | 1523.50 ± 78.36 |

Values are mean ± standard error of the mean. GBK was administered orally 30 min before ethanol administration. \*\*\*p<0.001 vs. CON group (ANOVA followed by Tukey's test). ALT, alanine aminotransferase; AST, aspartate aminotransferase; GLU, glucose; LDH, lactate dehydrogenase; CON, control group; KL, low-dose GBK group (15 mg/kg); KH, high-dose GBK group (30 mg/kg).
